# Supplementary material for: A surfactant-free emulsion RAFT polymerization of methyl methacrylate in a continuous tubular reactor
Source: Royal Society of Chemistry journal article supplement (doi:10.1039/c4py01456a), 2014-12-23
Supplement: c4py01456a1.pdf [file c4py01456a1.pdf]

## Support Information

### Surfactant-free Emulsion RAFT Polymerization of Methyl Methacrylate in a Continuous Tubular Reactor

5 Zhen Li, Weijie Chen, Zhengbiao Zhang, Lifen Zhang\*, Zhenping Cheng\* and Xiulin Zhu

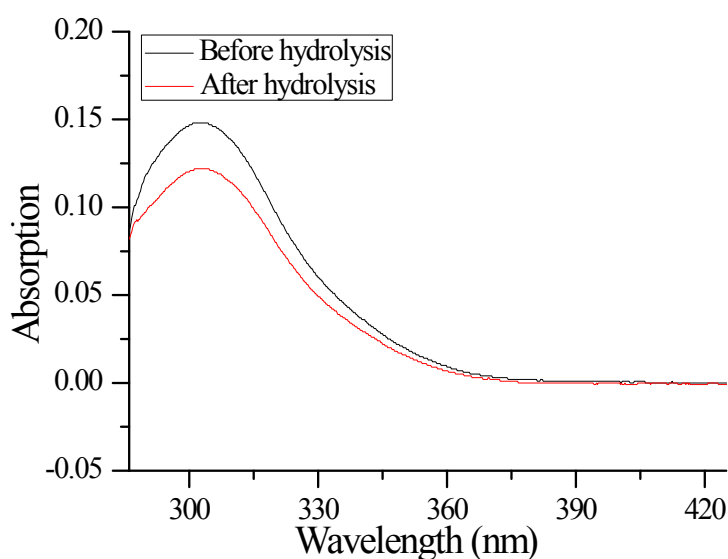

Figure S1. UV-vis spectra of RAFT agent CTBCOOH before and after hydrolysis. Max Absorption of CTBCOOH in THF is at 310 nm. Reaction conditions:  $[MMA]_0/[CTBCOOH]_0/[NaOH]_0 = 200/1/1$ ,  $V_{MMA}/V_{water}/V_{DMF} = 1/4/5$ ,  $V_{MMA} = 0.5$  mL, temperature = 90 °C,  $t = 50$  min. 20.0  $\mu$ L of the solution 10 diluted into 10 mL THF for testing. Hydrolysis percent =  $(1 - A_{after}/A_{before}) \times 100\% = (1 - 0.122/0.148) \times 100\% = 17.6\%$ .

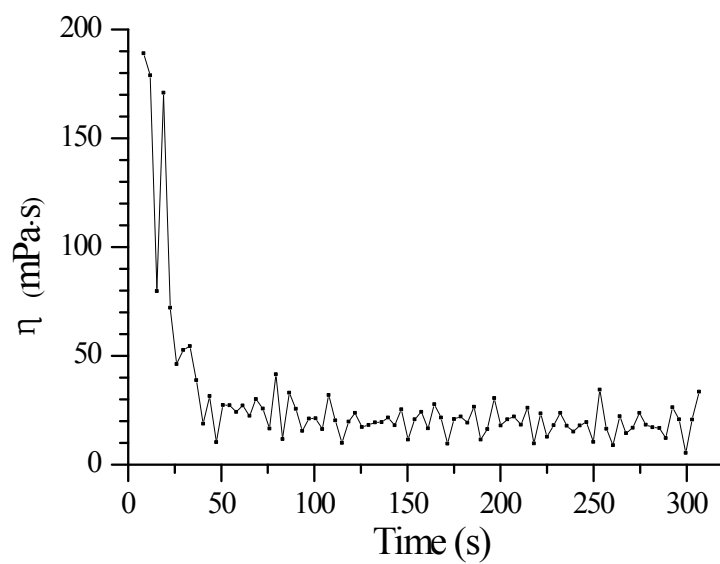

Figure S2. Viscosity ( $\eta$ ) of the latex as a function of time at 25 °C. Sample:  $M_{n, \text{GPC}} = 23600$  g/mol,  $M_w/M_n = 1.05$ , conversion = 89.8%; solid content was about 9 wt%.
